# Supplementary material for: Local application of FTY720 to the lung abrogates experimental asthma by altering dendritic cell function
Source: JCI journal article supplement (doi:10.1172/jci28295), 2006-11-01
Supplement: sd1 [file 1]

Supplementary Figure 1

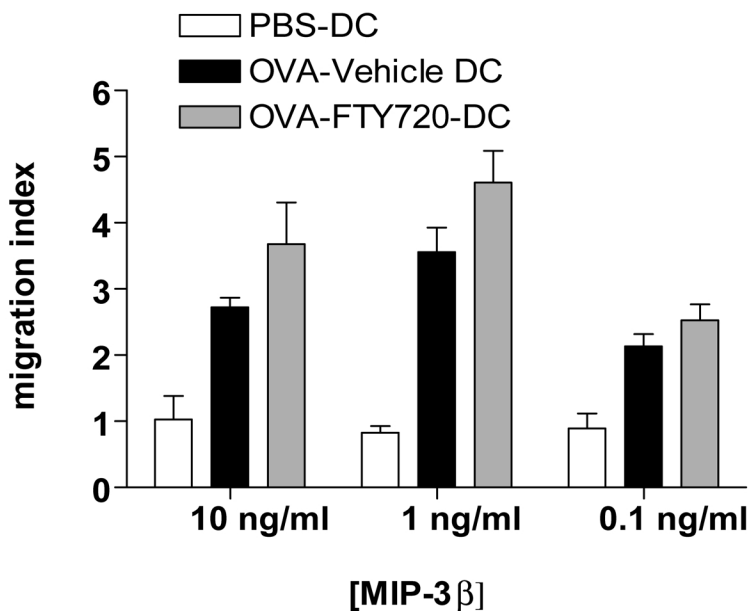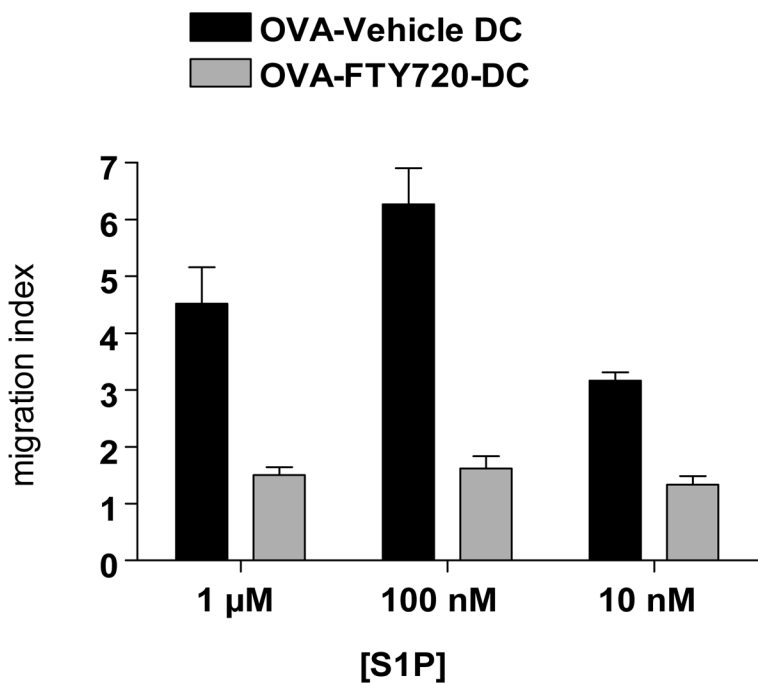

**Supplementary Figure 1: Effect of FTY720 treatment on migratory capacity of DCs *in vitro***

DCs were generated from bone marrow cells cultured in GM-CSF. After 8 days of culture, cells were exposed overnight to FTY720 or to vehicle either in the presence or absence of OVA antigen (containing a trace amount of LPS). Next cells were placed in the upper chamber of a Transwell migration assay. OVA exposed DCs showed enhanced migration towards the CCR7 agonist CCL19 (MIP3 $\beta$ ), and this was unaffected by prior FTY720 treatment. Responsiveness to S1P was however severely impaired by prior FTY720 treatment (lower panel).
